# Supplementary material for: Understanding the superior NH3-SCR activity of CHA zeolite synthesized via template-free interzeolite transformation
Source: Royal Society of Chemistry journal article supplement (doi:10.1039/d1qi01414e), 2022-01-01
Supplement: d1qi01414e1.pdf [file d1qi01414e1.pdf]

Electronic supplementary information for

**Understanding the superior NH<sub>3</sub>-SCR activity on CHA zeolite  
synthesized via template-free interzeolite transformation**

Nangui Lv,<sup>a</sup> Chenhu Sun,<sup>a</sup> Xueqin Wang,<sup>a</sup> Chan Wang,<sup>a,b</sup> Yuanyuan Yue,<sup>\*a,b</sup> and

Xiaojun Bao<sup>a,b,c</sup>

<sup>a</sup>*National Engineering Research Center of Chemical Fertilizer Catalyst, College of Chemical Engineering, Fuzhou University, Fuzhou 350002, P. R. China.*

<sup>b</sup>*Qingyuan Innovation Laboratory, Quanzhou 362801, China.*

<sup>c</sup>*State Key Laboratory of Photocatalysis on Energy & Environment, College of Chemistry, Fuzhou University, Fuzhou 350116, P. R. China.*

*\*Corresponding author. E-mail: yueyy@fzu.edu.cn (Y. Yue).*

**Table S1** The chemical composition of the parent USY and NaY.

| Component (wt%)                                              | NaY   | USY   |
|--------------------------------------------------------------|-------|-------|
| Na <sub>2</sub> O                                            | 12.66 | -     |
| SiO <sub>2</sub>                                             | 65.42 | 73.70 |
| Al <sub>2</sub> O <sub>3</sub>                               | 21.30 | 22.50 |
| P <sub>2</sub> O <sub>5</sub>                                | -     | 0.30  |
| CaO                                                          | 0.07  | 0.17  |
| SO <sub>3</sub>                                              | 0.35  | 0.13  |
| K <sub>2</sub> O                                             | 0.04  | -     |
| Fe <sub>2</sub> O <sub>3</sub>                               | 0.14  | 0.14  |
| SiO <sub>2</sub> /Al <sub>2</sub> O <sub>3</sub> molar ratio | 5.22  | 5.57  |

**Table S2** Distributed situation of surface element on Cu-CHA<sub>USY</sub> and Cu-CHA<sub>NaY</sub>.

| Sample                 | Cu <sup>+</sup> <sub>sur</sub> (wt.%) | Cu <sup>2+</sup> <sub>sur</sub> (wt.%) | Cu <sup>+</sup> /Si | Cu <sup>2+</sup> /Si |
|------------------------|---------------------------------------|----------------------------------------|---------------------|----------------------|
| Cu-CHA <sub>USY</sub>  | 1.28                                  | 1.16                                   | 0.0230              | 0.0209               |
| Cu-CHA <sub>NaY</sub>  | 1.55                                  | 0.48                                   | 0.0288              | 0.0088               |
| Cu-CHA <sub>TEPA</sub> | 1.70                                  | 0.89                                   | 0.0236              | 0.0130               |
| Cu-CHA <sub>TMA</sub>  | 1.96                                  | 0.28                                   | 0.0277              | 0.0040               |

**Table S3** Physicochemical properties of the different samples.

| Sample                 | Cu (wt%) | S <sub>BET</sub> (m <sup>2</sup> /g) | S <sub>mic</sub> (m <sup>2</sup> /g) |
|------------------------|----------|--------------------------------------|--------------------------------------|
| Cu-CHA <sub>USY</sub>  | 4.40     | 295                                  | 265                                  |
| Cu-CHA <sub>TEPA</sub> | 4.62     | 488                                  | 453                                  |
| Cu-CHA <sub>TMA</sub>  | 4.46     | 434                                  | 427                                  |

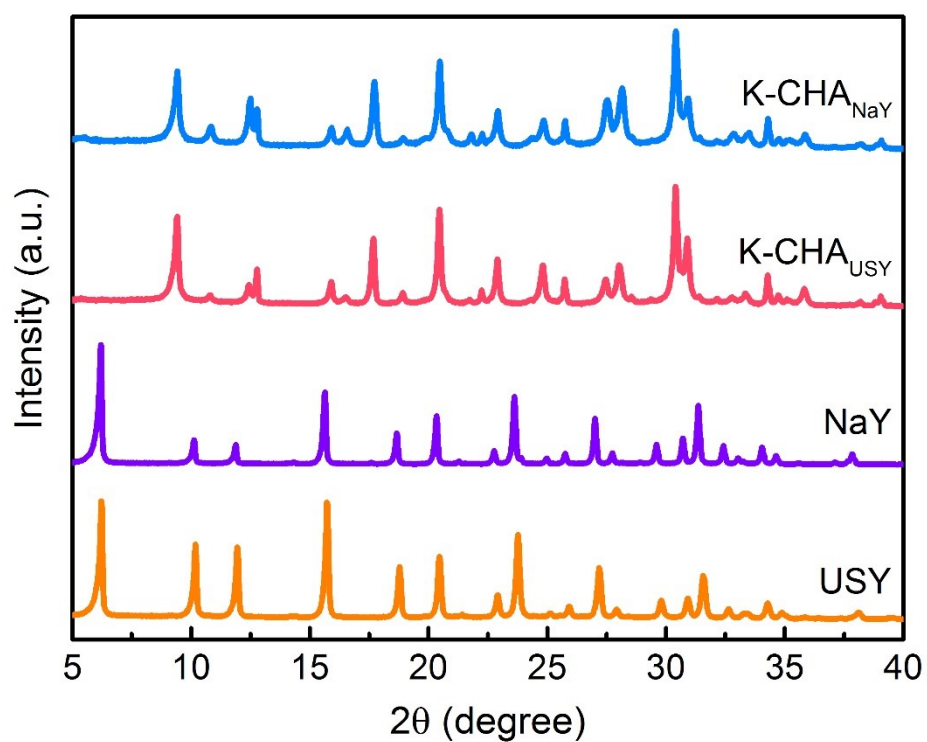

**Fig. S1** XRD patterns of USY, NaY, K-CHA<sub>USY</sub>, and K-CHA<sub>NaY</sub>.

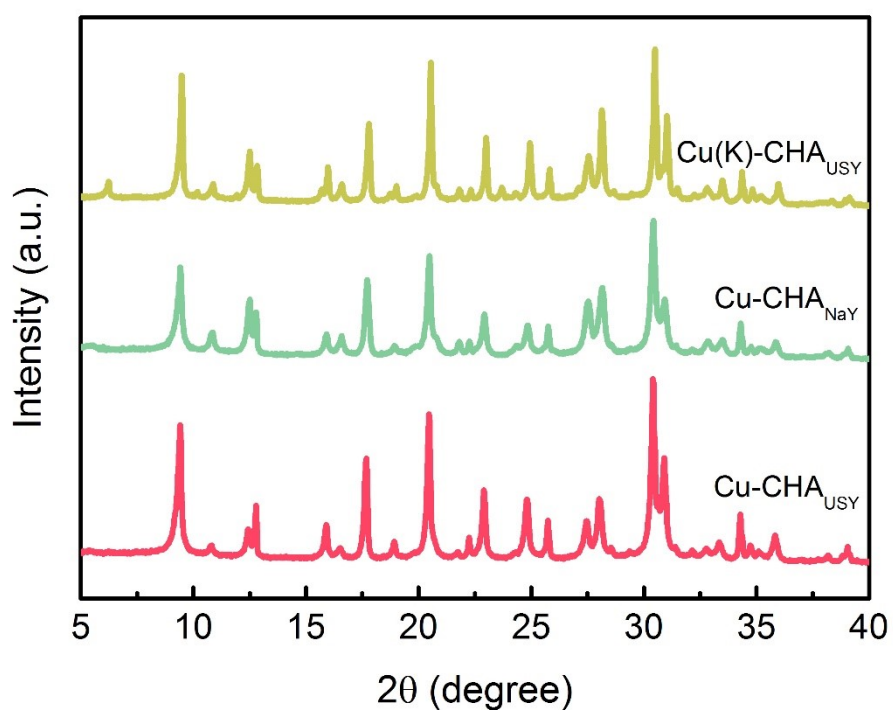

**Fig. S2** XRD patterns of Cu-CHA<sub>USY</sub>, Cu-CHA<sub>NaY</sub>, and Cu(K)-CHA<sub>USY</sub>.

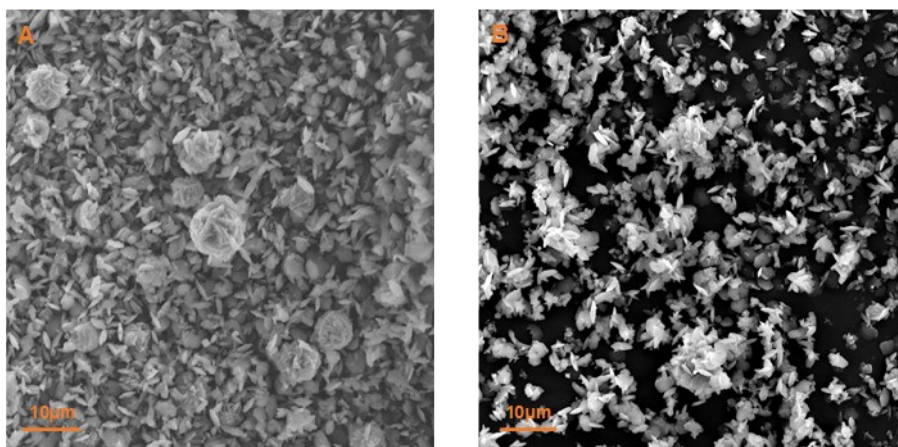

**Fig. S3** SEM images of K-CHA<sub>USY</sub> and K-CHA<sub>NaY</sub>.

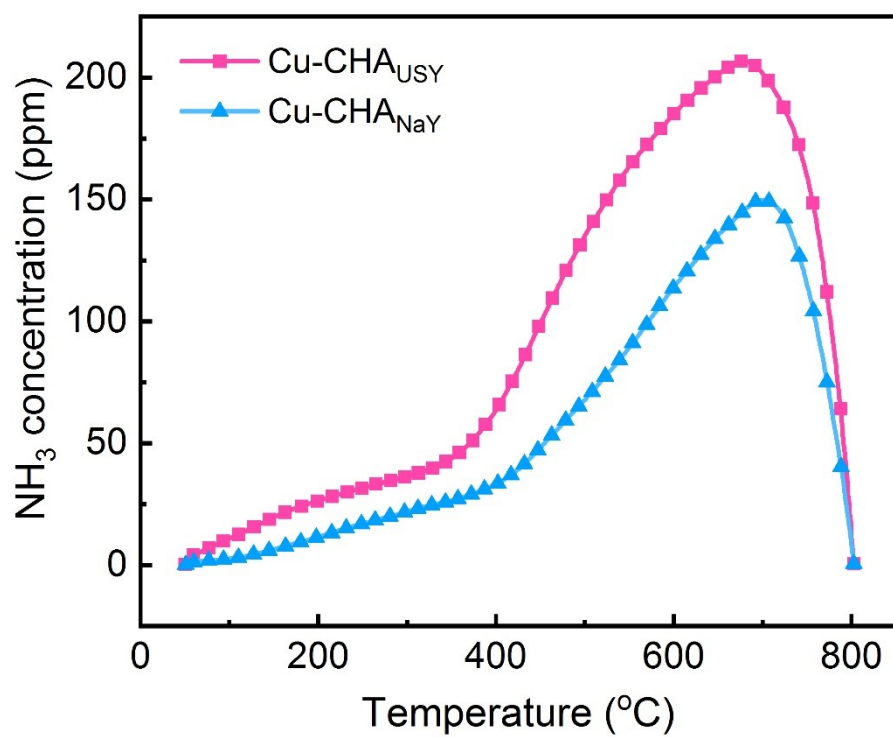

**Fig. S4** NH<sub>3</sub>-TPD profiles of Cu-CHA<sub>USY</sub> and Cu-CHA<sub>NaY</sub>.



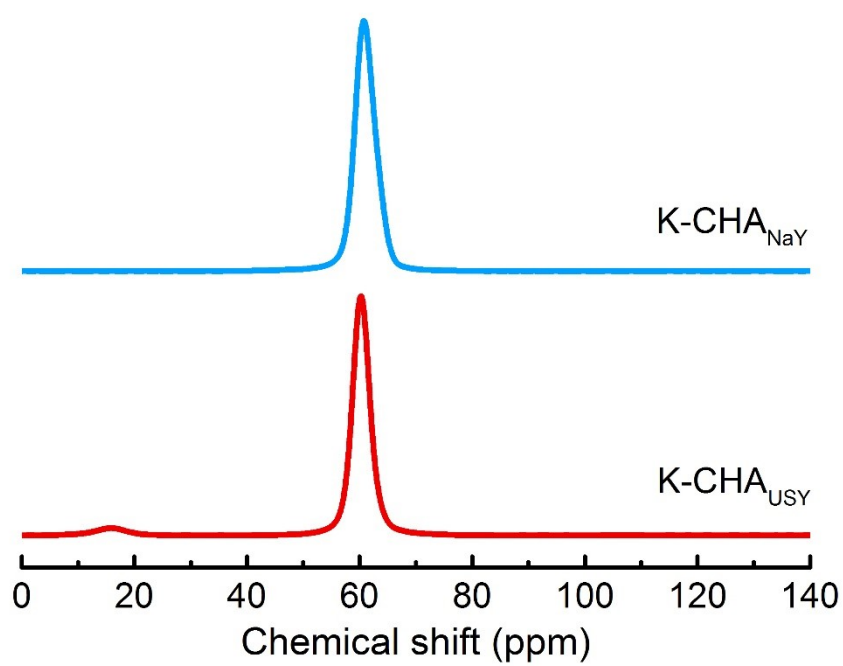

**Fig. S5**  $^{27}\text{Al}$  MAS NMR spectra of K-CHA<sub>NaY</sub> and K-CHA<sub>USY</sub>.

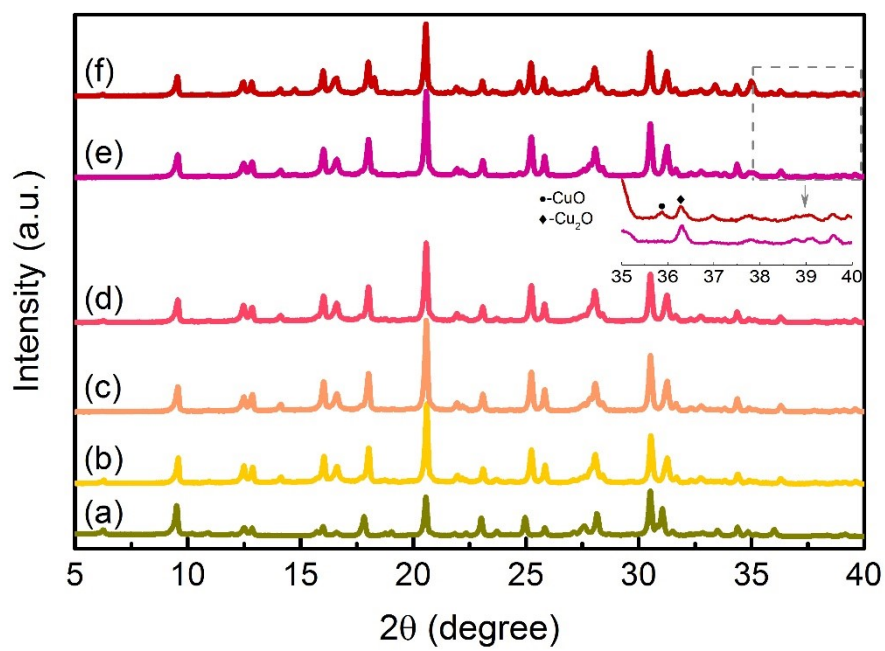

**Fig. S6** XRD patterns of (a) K-CHA<sub>USY</sub>, (b) Cu-CHA<sub>USY</sub>-0.25, (c) Cu-CHA<sub>USY</sub>-0.35, (d) Cu-CHA<sub>USY</sub>-0.40, (e) Cu-CHA<sub>USY</sub>-0.43, and (f) Cu-CHA<sub>USY</sub>-0.47.

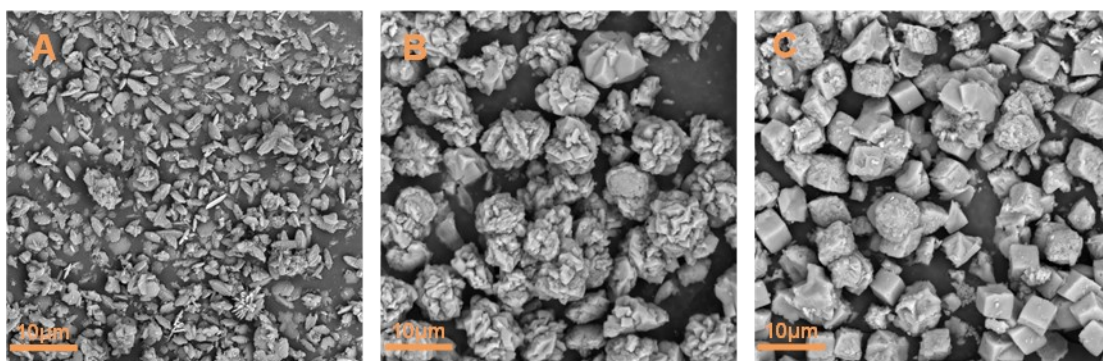

**Fig. S7** SEM images of Cu-CHA<sub>USY</sub>, Cu-CHA<sub>TEPA</sub> and Cu-CHA<sub>TMA</sub>.

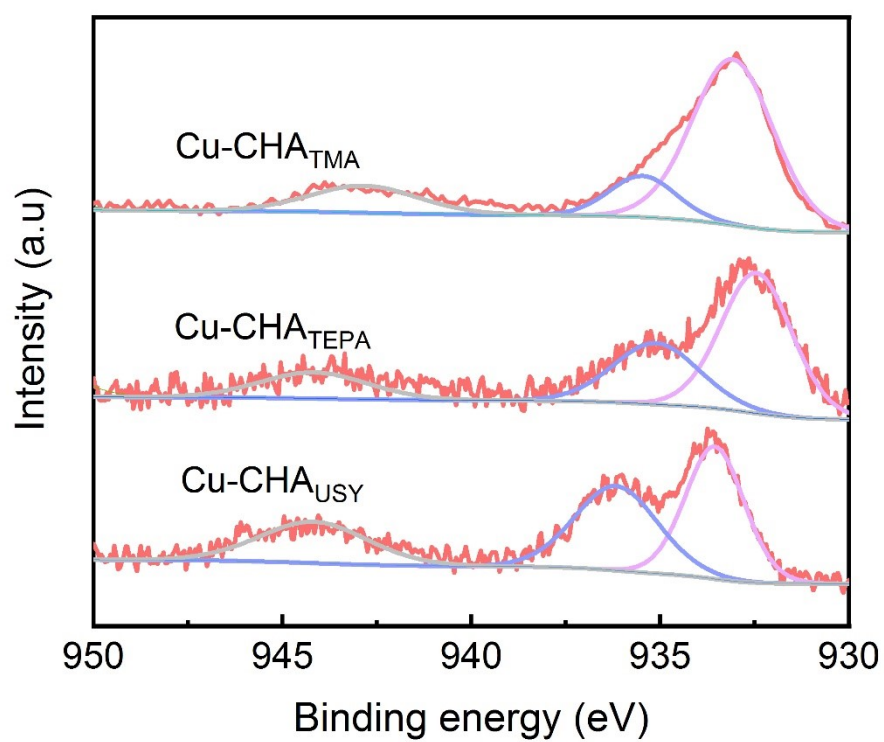

**Fig. S8** XPS spectra of Cu-CHA<sub>USY</sub>, Cu-CHA<sub>TEPA</sub> and Cu-CHA<sub>TMA</sub>.

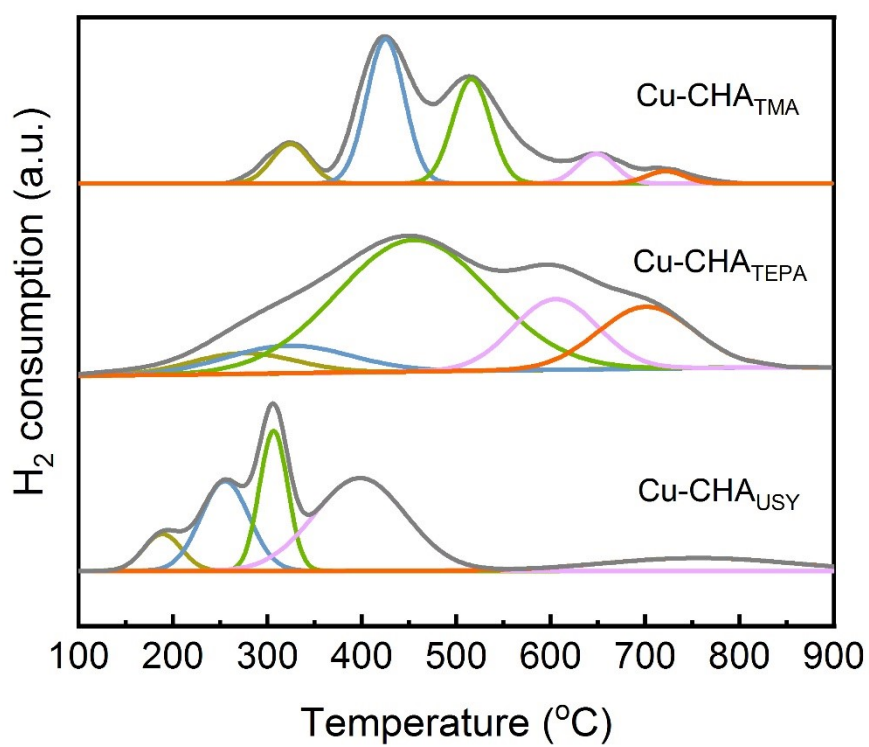

**Fig. S9** H<sub>2</sub>-TPR profiles of Cu-CHA<sub>USY</sub>, CHA<sub>TEPA</sub> and CHA<sub>TMA</sub>.

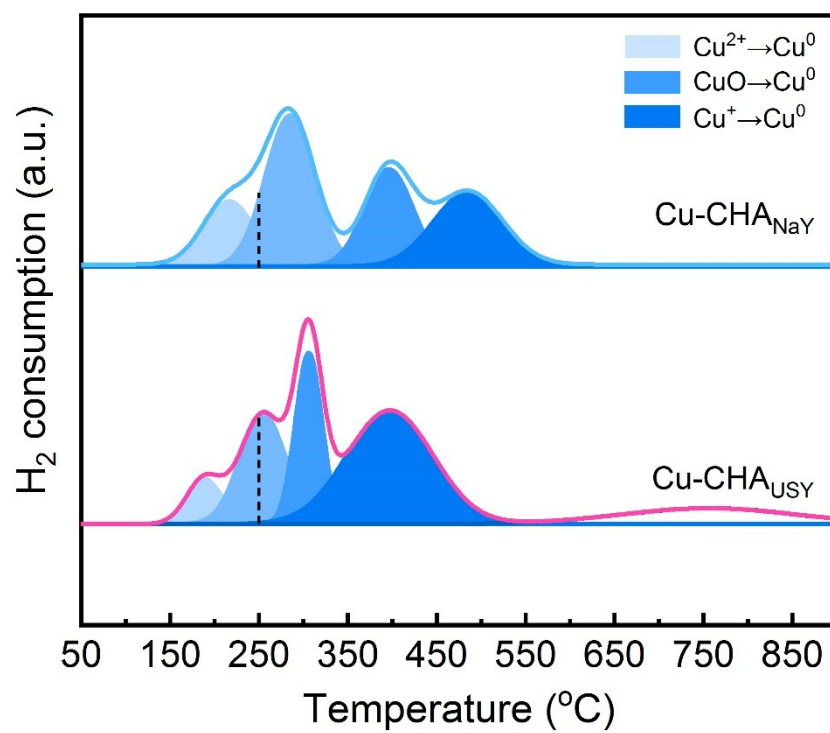

**Fig. S10** H<sub>2</sub>-TPR profiles of Cu-CHA<sub>USY</sub> and Cu-CHA<sub>NaY</sub>.
